# Supplementary material for: Me, Myself, and I: Neural Activity for Self versus Other Across Development
Source: Preprints.org preprint supplement (doi:10.20944/preprints202310.1361.v1), 2023-10-20
Supplement: Supplementary file 1 [file supplementary]

## Autorisation

Par la présente, j'autorise mon enfant Léonie DENERVAUD à être prise en photo et l'utilisation ultérieure de son image à des fins de publication scientifique.

Signature du représentant légal :

Solange DENERVAUD

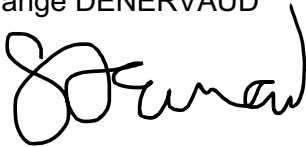

Fait à Lausanne, le 20 octobre 2023
